# Supplementary material
Source: PubMed Central journal article supplement (PMC6579719)

Figure S1

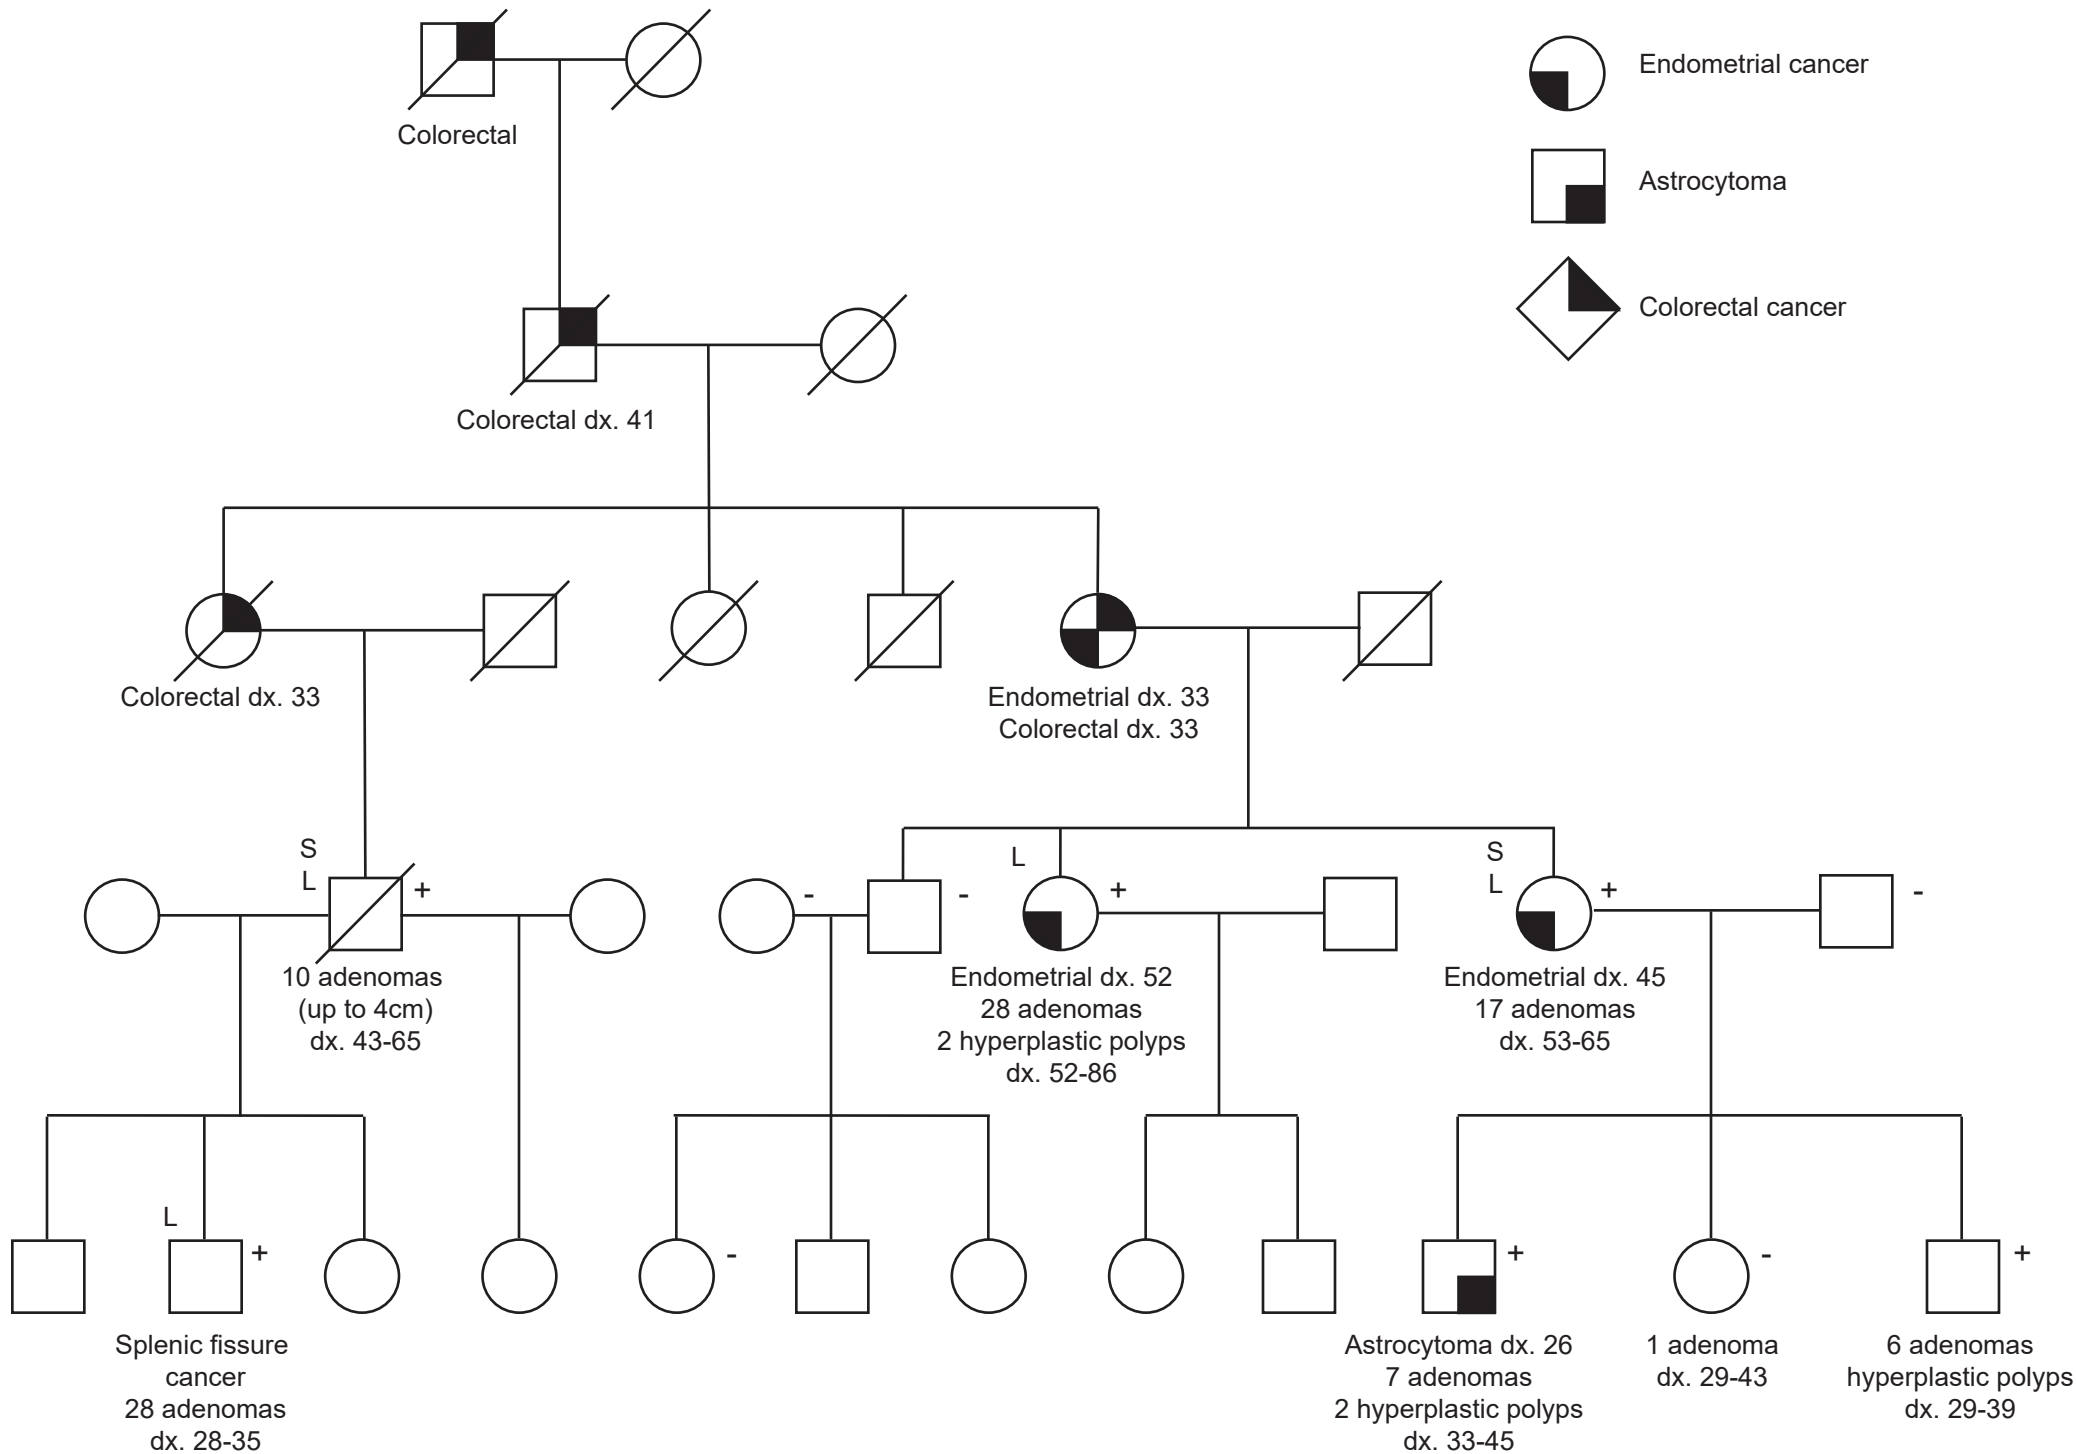

Supplement: NIHMS1521473-supplement-Supplementary__Figure_S1.pdf [file NIHMS1521473-supplement-Supplementary__Figure_S1.pdf]
